# Supplementary material
Source: PubMed Central journal article supplement (PMC5748165)
Supplement: pnas.201705381SI.pdf [file pnas.201705381SI.pdf]

# Supporting Information

Hwang et al. 10.1073/pnas.1705381114

## SI Materials and Methods

**Tanimoto Coefficients.** Each of the ligands in the 105,646 holo structures used by LBias was converted into 2D fingerprints using the *FP2* feature from the *Open Babel* package. The 2D fingerprint is a 1,024-bit-long string where each bit is either 1 or 0 reflecting whether the ligand does or does not contain a given chemical group. Fingerprints were used to calculate pairwise Tanimoto coefficients that measure molecular similarity. Specifically,

$$\text{Tanimoto coefficient}(X, Y) = \frac{n(X \cap Y)}{n(X) + n(Y) - n(X \cap Y)}, \quad [\text{S1}]$$

where  $n(X)$  and  $n(Y)$  are the number of 1's in the fingerprint of each ligand  $X$  and  $Y$ , and  $n(X \cap Y)$  is the number of 1's that appear at common positions in the fingerprints of  $X$  and  $Y$ . For a given two molecules, the Tanimoto coefficient ranges from 0 to 1 with larger values reflecting greater similarity.

**Precision–Recall Curves.** For a given query protein, all of its residues were sorted based on the value of  $R$  described above. The list is scanned in order and for each true-positive ligand-binding residue,  $r$ , encountered, a precision  $[\text{TP}/(\text{TP}+\text{FP})]$  and recall  $[\text{TP}/(\text{TP}+\text{FN})]$  is obtained and plotted.  $\text{TP}$  and  $\text{FP}$  are obtained by counting the number of true positives and false positives ranked above  $r$ , and  $\text{FN}$  is obtained by counting the number of true positives ranked below  $r$ . This procedure is carried out until all true positives are accounted for (i.e., the recall reaches 1).

**Naive Bayes for LT-Scanner/Seq.** We arbitrarily chose 10 and 20 as the total number of bins for  $\text{Sim}_{\text{LT-scanner}}$  of LT-scanner and  $-\log$  of BLAST e-value and divided them into equal intervals. Likelihood ratios (LRs) for each bin are calculated as the ratio of known drug–target interactions with a score in a given bin divided by the ratio of drug–target interactions in a negative set using 10-fold cross-validation.



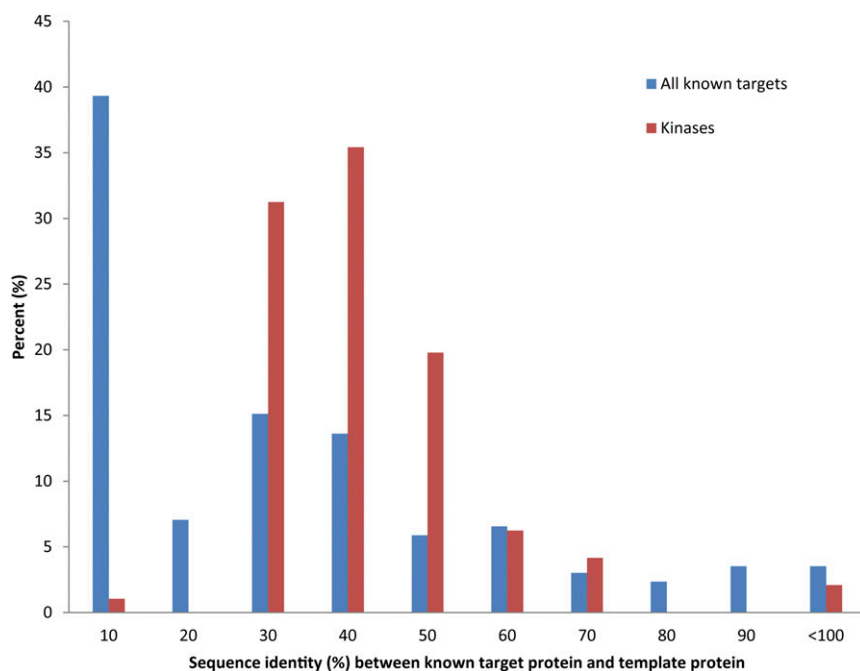

Fig. S2. Distribution of sequence identities (in percentage) between known human target proteins and template proteins that were used for predictions.

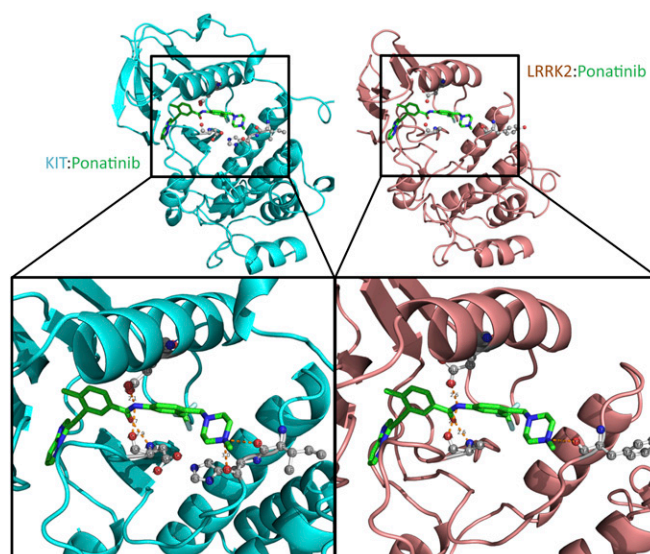

Fig. S3. Hydrogen bond similarity between KIT and LRRK2. The figure shows an example of interaction similarities between KIT (cyan):ponatinib (green) and LRRK2 (salmon):ponatinib (green) using hydrogen bonds. KIT makes five hydrogen bonds (dotted orange lines) with ponatinib. (PDB ID code 4u0i) OE1 atom of KIT GLU640 makes a hydrogen bond with N2 atom of ponatinib and the other four hydrogen bonds are formed through backbone atoms that are O atoms of ILE789, HIS790, and ASP810 and N atom of ASP810 that interact with N4, N4, N2, and O1 atoms of ponatinib, respectively. Based on LT-scanner prediction, LRRK2 makes four (out of the five) similar hydrogen bonds (dotted orange lines) as seen in KIT:ponatinib cocrystal structure. OE2 atom of LRRK2 GLU37 is predicted to form a hydrogen bond with N2 atom of ponatinib. Other three predicted hydrogen bonds are among backbone atoms that are O atoms of TYR101, ALA127, and N atom of ALA127 that interact with N4, N2, and O1 atoms of ponatinib, respectively. It is noteworthy that LT-scanner predicted LRRK2 possibly form similar hydrogen bonds compared with KIT to bind ponatinib through backbone atoms even though their residue types are different.
